# Supplementary material for: Combining in situ FTIR spectroscopy, BTEM analysis, bulk density measurements and DFT for two Diels–Alder reactions. A general approach for partial molar volume and reaction volume analyses
Source: Royal Society of Chemistry journal article supplement (doi:10.1039/c3ra47057a), 2014-01-01
Supplement: c3ra47057a1.pdf [file c3ra47057a1.pdf]

## Combining in situ FTIR Spectroscopy, BTEM Analysis, Bulk Density Measurements and DFT for Two Diels-Alder Reactions. A General Approach for Partial Molar Volume and Reaction Volume Analyses.

A Martin Tjahjono\*, Gao Feng, Martin Wijaya Hermanto, Foo Cechao and Marc Garland\*.

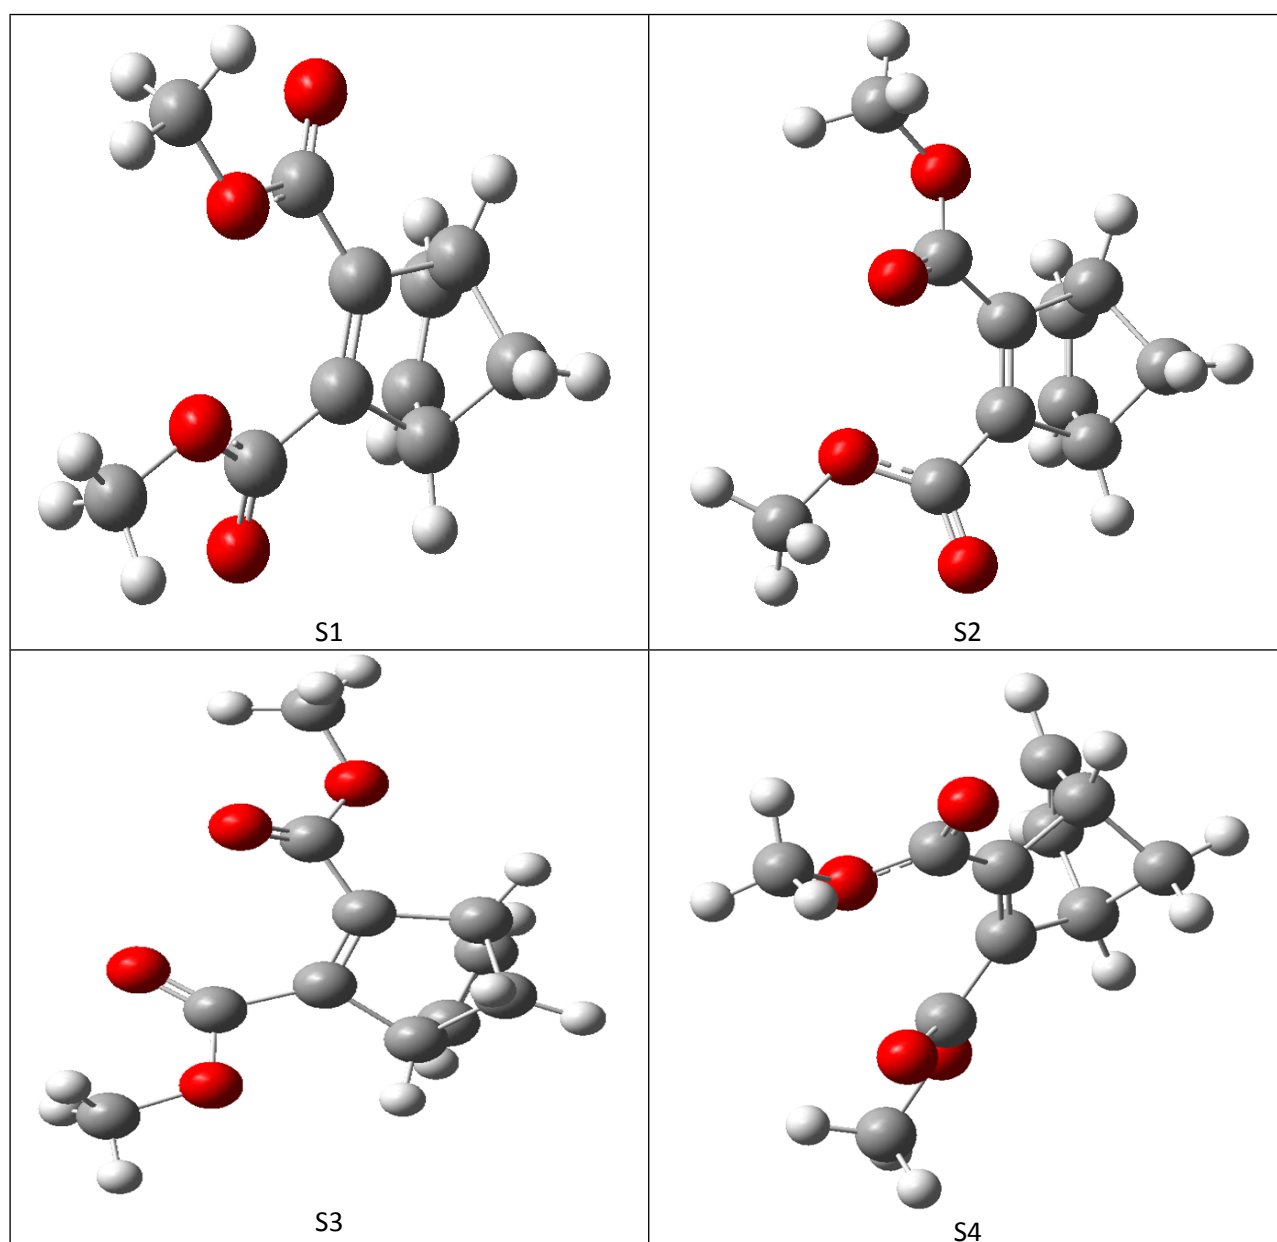

Fig. S1. Optimized geometries of esters with different coordination modes. S4 is the one used in Fig. 12c in the paper.

**Table S1** DFT calculated free energies for the four scenarios in Fig S1 Sa,Sb,Sc,Sd.

| Structure | Sum of electronic and thermal Free Energies (Hartree/Particle)<br>(298 K,1atm) |
|-----------|--------------------------------------------------------------------------------|
| S1        | -727.107997                                                                    |
| S2        | -727.111741                                                                    |
| S3        | -727.110408                                                                    |
| S4        | -727.111737                                                                    |

**Table S2.** Comparison of calculated molar volumes of solutes and their corresponding partial molar volumes in toluene at 298.15 K. This is an augmented version of Table 4 in the paper, with the yellow column for SCI-IPCM.

| Species                                                                                                                                                                                                                                                                                                                                                                | $V_{calc}(\text{cm}^3 \cdot \text{mol}^{-1})$ <sup>a1</sup><br>IPCM | $V_{m,est}(\text{cm}^3 \cdot \text{mol}^{-1})$ <sup>b</sup> IPCM | $V_{calc}(\text{cm}^3 \cdot \text{mol}^{-1})$ <sup>a2</sup><br>SCI-IPCM | $V^\infty(\text{cm}^3 \cdot \text{mol}^{-1})$ <sup>c</sup> |
|------------------------------------------------------------------------------------------------------------------------------------------------------------------------------------------------------------------------------------------------------------------------------------------------------------------------------------------------------------------------|---------------------------------------------------------------------|------------------------------------------------------------------|-------------------------------------------------------------------------|------------------------------------------------------------|
| CPD <sup>d</sup>                                                                                                                                                                                                                                                                                                                                                       | 61.5                                                                | 82.0 (-1.6%)                                                     | 69.9 (-16.0%)                                                           | 83.3                                                       |
| DMAD <sub>d</sub>                                                                                                                                                                                                                                                                                                                                                      | 95.0                                                                | 126.7 (1.7%)                                                     | 115.9 (-7.0%)                                                           | 124.6                                                      |
| Adduct <sub>d</sub>                                                                                                                                                                                                                                                                                                                                                    | 144.7                                                               | 192.9 (14.5%)                                                    | 166.4 (-2.1%)                                                           | 170.0                                                      |
| CPD <sup>e</sup>                                                                                                                                                                                                                                                                                                                                                       | 61.5                                                                | 82.0 (-0.2%)                                                     | 69.9 (-15.0%)                                                           | 82.2                                                       |
| DCPD <sub>e</sub>                                                                                                                                                                                                                                                                                                                                                      | 111.8                                                               | 149.1 (11.7%)                                                    | 121.0 (-9.4%)                                                           | 133.5                                                      |
| <sup>a1</sup> from DFT calculations with SCRF=IPCM, <sup>a2</sup> from DFT calculations with SCRF= SCI-IPCM<br><sup>b</sup> $V_{m,est}=V_{calc}/ 0.75$ , deviation to the corresponding PMV is shown in parenthesis<br><sup>c</sup> PMV obtained from multi-component reaction system<br><sup>d</sup> from CPD + DMAD reaction<br><sup>e</sup> from CPD + CPD reaction |                                                                     |                                                                  |                                                                         |                                                            |

Gaussian calculation temperature: 298K
